# Supplementary material for: Cost effectiveness and resource allocation of Plasmodium falciparum malaria control in Myanmar: a modelling analysis of bed nets and community health workers
Source: PubMed Central journal article supplement (PMC4587798; doi:10.1186/s12936-015-0886-x), 2015-09-29
Supplement: 12936_2015_886_MOESM1_ESM.pdf [file 12936_2015_886_MOESM1_ESM.pdf]

## Supporting material for the paper:

### Cost effectiveness and resource allocation of malaria control in Myanmar:

#### A modelling analysis of bed nets and community health workers

##### Appendix 1: Univariate and Probabilistic Sensitivity Analysis

Three probabilistic analyses are included here, with important limitations. There is very little data available for more informative parametric sampling distributions. To err of the side of caution and methods are chosen to over-rather than under-estimate parameter uncertainty. Parameter values are sampled from uniform distributions between the ranges described in Table 1 in the main paper (n=1000). There is also no accounting for joint parameter variability; when two or more parameter values are not independent of one another. The probability of using a CHW may well be related to the availability of ACTs elsewhere, but at this time there is no data with which to characterise a joint distribution.

Figure S1 present a standard PSA analysis presented as a scatter plot on the cost effectiveness plane. Figure S2 presents the cost effectiveness acceptability curve (CEAC) using willingness-to-pay values between US\$0 and US\$3000 per DALY averted. Consistent colour coding is used throughout; Blue: bed nets; Green: community health workers and Orange: Both interventions.

**Figure S1: Probabilistic sensitivity analysis of the cost effectiveness of malaria control and elimination in Myanmar**

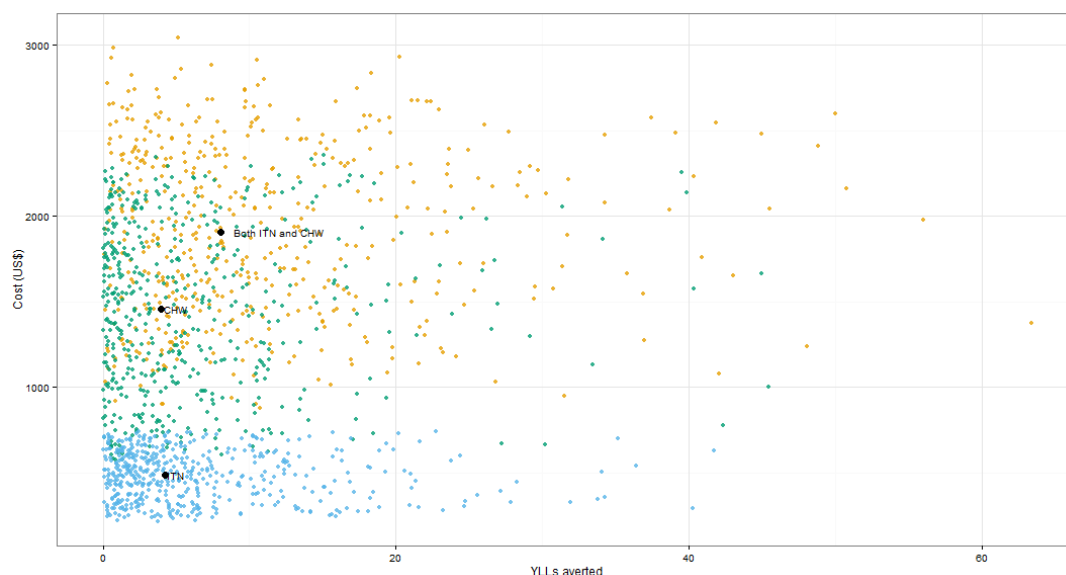

**Figure S2: Cost effectiveness acceptability curve (CEAC) for malaria interventions in Myanmar**

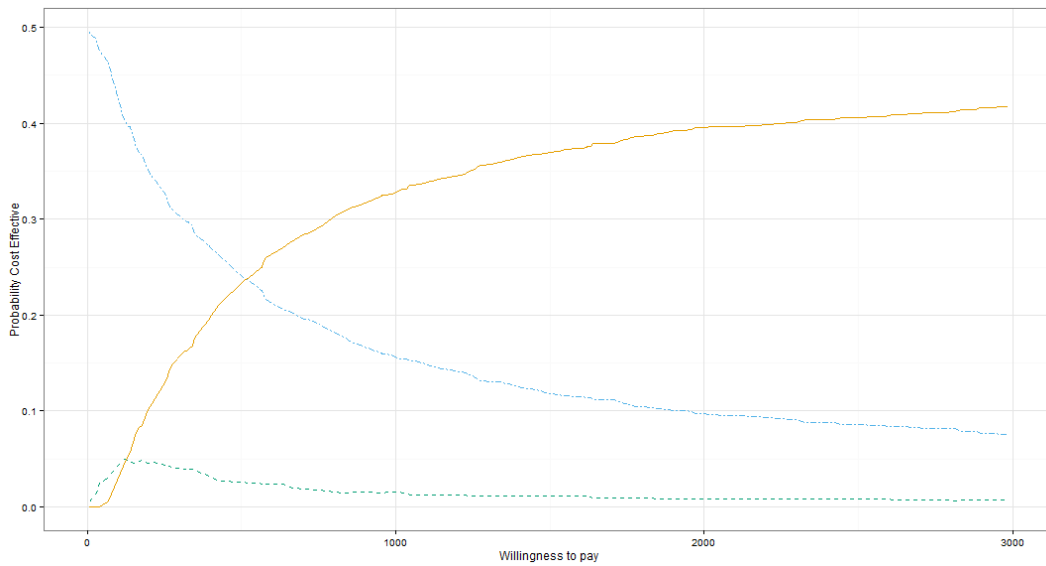

Secondly, a partial PSA was carried out within the bounds of the scenario analysis. In this case, the parameters defined by the scenario analysis can be considered considered ‘variability’ rather than uncertainty and as changes between settings are fixed for illustration of different scenarios. The probability of malaria is also considered to be a variable rather than uncertain parameter and is held constant at the default value. The PSA presents the residual uncertainty assuming the parameters defined by the scenario are known. It is worth noting that compared with the full PSA there is less overlap between intervention results, highlighting that better information key areas of variability, including remoteness, could improve decision making.

**Figure S3: Scenario analysis and partial probabilistic sensitivity analysis of the cost effectiveness of malaria control and elimination in Myanmar**

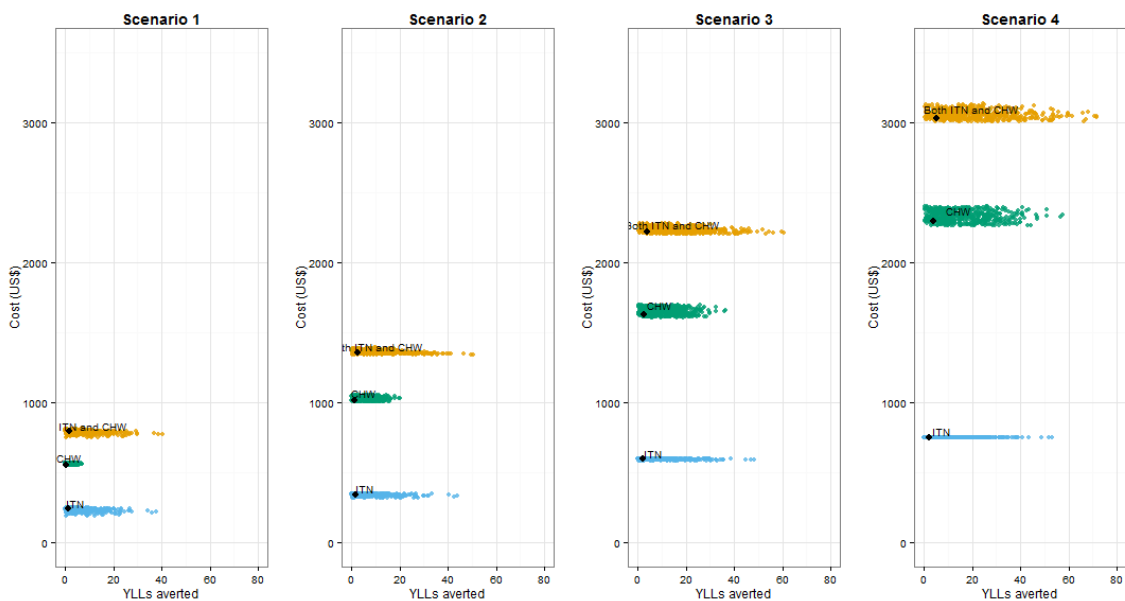



## Appendix 2: Cost sharing for community health worker programmes

Some community health workers in Myanmar are trained to deliver not only malaria diagnosis and treatment but a range of additional health services. It is beyond the scope of this study to quantify the health impact of these services. Instead we present a cost sharing scenario, where one third of the cost burden is carried by malaria funding. Additional costs for further training or commodities are not included here. Here ITN are considered a malaria specific intervention and cost sharing is not applied.

Table S2 and Figure S6 show that with 1:2 cost sharing malaria to other services, CHW are now the most cost effective intervention in difficult and very difficult to access scenarios and also potentially cost effective in accessible and easily accessible scenarios. This illustrates the potential advantages of integrated service delivery and the resulting economies of scope. At the same time there is a limit to the capacity of CHW to take on additional responsibilities. Usually CHW also work full time to support themselves and their families.

**Table S2: Costs and effects of malaria interventions in four remoteness scenarios with cost sharing for CHW**

|                      |               | <b>Remoteness:</b>       |                   |                            |                                 |
|----------------------|---------------|--------------------------|-------------------|----------------------------|---------------------------------|
|                      |               | <b>Easily Accessible</b> | <b>Accessible</b> | <b>Difficult to Access</b> | <b>Very Difficult to Access</b> |
| <b>ITN</b>           | <b>Cost</b>   | 239                      | 343               | 597                        | 750                             |
|                      | <b>Effect</b> | 135                      | 171               | 198                        | 225                             |
|                      | <b>CER</b>    | 1.77                     | 2.01              | 3.01                       | 3.33                            |
|                      | <b>ICER</b>   | -                        | -                 | Dominated                  | -                               |
| <b>CHW</b>           | <b>Cost</b>   | 183                      | 335               | 537                        | 757                             |
|                      | <b>Effect</b> | 56                       | 149               | 263                        | 405                             |
|                      | <b>CER</b>    | 3.26                     | 2.26              | 2.04                       | 1.87                            |
|                      | <b>ICER</b>   | 0.70                     | 0.36              | -                          | 0.04                            |
| <b>CHW &amp; ITN</b> | <b>Cost</b>   | 422                      | 678               | 1134                       | 1507                            |
|                      | <b>Effect</b> | 174                      | 275               | 382                        | 509                             |
|                      | <b>CER</b>    | 2.42                     | 2.47              | 2.97                       | 2.96                            |
|                      | <b>ICER</b>   | 4.66                     | 3.22              | 5.01                       | 7.25                            |

\*CER here compares costs and effects of an intervention compared with no intervention

\*\* ICER compares costs and effects of an intervention compared with the next most effective undominated option

Figure S6: Costs and effects of malaria control in different accessibility scenarios with cost sharing for CHW

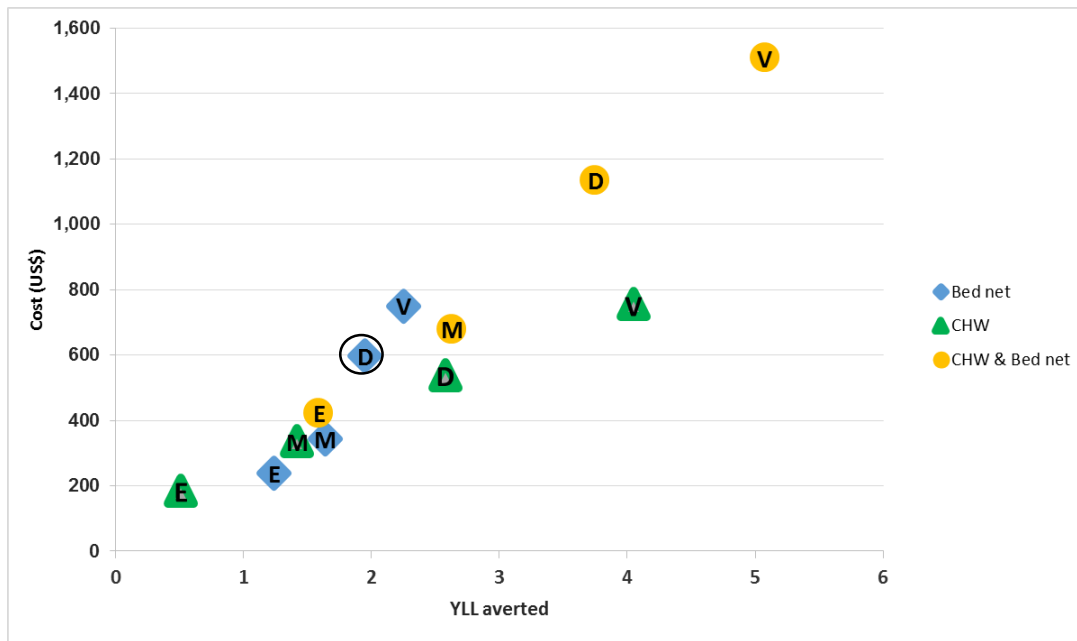

### Appendix 3: Alternative model variant using “transmission days averted” as an effect metric

A limitation of the model used in the main body of this paper is the focus on direct impact. A more complex dynamic transmission model may be able to capture indirect effects. Here the model calculates effect size in the number of days of malaria transmission averted through treatment of cases or cases directly averted by bed nets. This metric was identified as a proxy for the impact of interventions on malaria transmission, rather than on direct health outcomes.

The probability tree (Figure S7) traces an individual through a chronological series of event possibilities beginning with an annual probability of contracting malaria ( $m$ ) which is adjusted by the protective effect of ITN ( $p$ ), if applicable. Individuals with malaria have a probability they will receive treatment from a provider other than a CHW ( $a$ ). If a CHW is available in the village there is a probability ( $q$ ) that a malaria case will seek treatment from the CHW, from both those who would have received treatment elsewhere and from those who would not have received any treatment. Each case of malaria has a mean number of malaria transmission days in the absence of treatment ( $t$ ). We assume that non CHW treatment is with an ACT and that CHW treatment is with ACT plus primaquine. The reduction in transmission days is less for ACT treatment ( $r_2$ ) than ACT plus primaquine ( $r_3$ ) reflecting policy at the time of analysis. The terminal payoffs are scaled by village population ( $v$ ) and calculate the net cost and net effects for each intervention arm for one village. Parameter values and ranges are found in Table S3.

**Table S3: Parameter list and values for decision tree models**

|                     | Model parameter                                                     | Symbol    | Default Value | Source                                                                                                                                                                                                                                                                                                                                             |
|---------------------|---------------------------------------------------------------------|-----------|---------------|----------------------------------------------------------------------------------------------------------------------------------------------------------------------------------------------------------------------------------------------------------------------------------------------------------------------------------------------------|
| <i>Setting</i>      | Baseline access to treatment (% of cases receiving ACT)             | $a$       | 30%           | 2011 MARC survey indicates low ACT availability, but recently survey by PSI indicates a substantial increase.                                                                                                                                                                                                                                      |
|                     | Cost of treatment                                                   | $c_{ACT}$ | \$3           | Wholesale price of diagnosis and treatment, consumables only. 3MDG.                                                                                                                                                                                                                                                                                |
|                     | Number of transmission days per case                                | $t$       | 30            | Assumed a mean period of communicability of 30 days if untreated.                                                                                                                                                                                                                                                                                  |
|                     | Probability of getting malaria                                      | $m$       | 5%            | Probability of malaria is highly variable but changes do not affect comparative analysis between intervention options.                                                                                                                                                                                                                             |
|                     | Probability that a person with malaria uses a CHW (where available) | $q$       | 30%           | Community survey by Department of Medical Research in Myanmar finds 19% of surveyed <i>first</i> seek treatment at CHW (unpublished). This parameter reflects the total treatment seeking proportion, not only the first place. Community survey in Cambodia finds low utilisation of CHW in villages with a CHW (Yeung <i>et al.</i> unpublished) |
|                     | Village population                                                  | $v$       | 500           | Village size is based on unpublished unicef data. At the time of the study the village level census data was unavailable.                                                                                                                                                                                                                          |
| <i>Intervention</i> | Annual cost of ITN per person                                       | $c_{ITN}$ | \$0.70        | Estimated using financial reports from donors and implementing partners.                                                                                                                                                                                                                                                                           |
|                     | Annual cost of CHW per person                                       | $c_{CHW}$ | \$2           | Estimated using financial reports from donors and implementing partners.                                                                                                                                                                                                                                                                           |
|                     | ITN protective efficacy                                             | $p$       | 30%           | (5,7,15,16)                                                                                                                                                                                                                                                                                                                                        |
|                     | Reduction in infectious days after treatment with ACT               | $r_2$     | 80%           | Assumed ACT treatment results is reduction from 30 to 6 transmission days.                                                                                                                                                                                                                                                                         |
|                     | Reduction in infectious days after treatment with ACT+PQ            | $r_3$     | 90%           | Assumed ACT treatment results is reduction from 30 to 3 transmission days.                                                                                                                                                                                                                                                                         |

**Figure S7 Transmission Days Averted Outcomes Decision Tree**

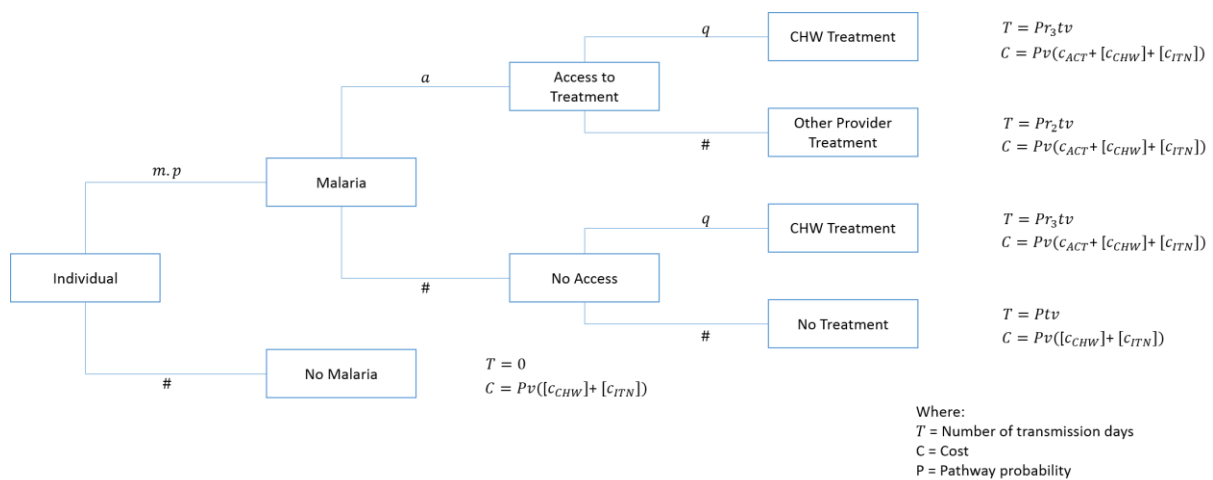

The trends in results are not substantially different from the model for DALYs averted. In the easily accessible village setting CHW avert 56 transmission days per year at a cost of US\$ 556 (US\$ 9.88 per transmission day averted). This rises in the very difficult to reach villages to 405 transmission days averted at a cost of US\$ 2295 (US\$ 5.67 per transmission day averted). Bed nets were consistently less costly and a modestly effective intervention. In the easily accessible village setting bed nets are predicted to avert 135 transmission days at a cost of US\$ 239 (US\$ 1.77 per transmission day averted), rising to 225 transmission days averted for US\$ 750 (US\$ 3.33 per transmission day averted). A combination of both bed nets and CHW in the very difficult to access village setting gives the greatest impact of 509 transmission days averted for a cost of US\$ 3032 (US\$ 5.96 per transmission day averted). The above results are summarised in Table S4 and Figure S8 and assume here that CHW only provide malaria services.

**Table S4: Costs and effects of malaria interventions in four remoteness scenarios**

|           |        | Remoteness:       |                |                     |                          |
|-----------|--------|-------------------|----------------|---------------------|--------------------------|
|           |        | Easily Accessible | Accessible     | Difficult to Access | Very Difficult to Access |
| ITN       | Cost   | 239               | 343            | 597                 | 750                      |
|           | Effect | 135               | 171            | 198                 | 225                      |
|           | CER    | 1.77              | 2.01           | 3.01                | 3.33                     |
| CHW       | Cost   | 556               | 1016           | 1629                | 2295                     |
|           | Effect | 56                | 149            | 263                 | 405                      |
|           | CER    | 9.88              | 6.84           | 6.19                | 5.67                     |
|           | ICER   | Abs. Dominated    | Abs. Dominated | Ext. Dominated      | 8.58                     |
| CHW & ITN | Cost   | 793               | 1354           | 2217                | 3032                     |
|           | Effect | 174               | 275            | 382                 | 509                      |
|           | CER    | 4.55              | 4.93           | 5.80                | 5.96                     |
|           | ICER   | 14.07             | 9.73           | 8.79                | 7.12                     |

\*CER here compares costs and effects of an intervention compared with no intervention

\*\* ICER compares costs and effects of an intervention compared with the next most effective undominated option

**Figure S8: Costs and effects of malaria control in different accessibility scenarios**

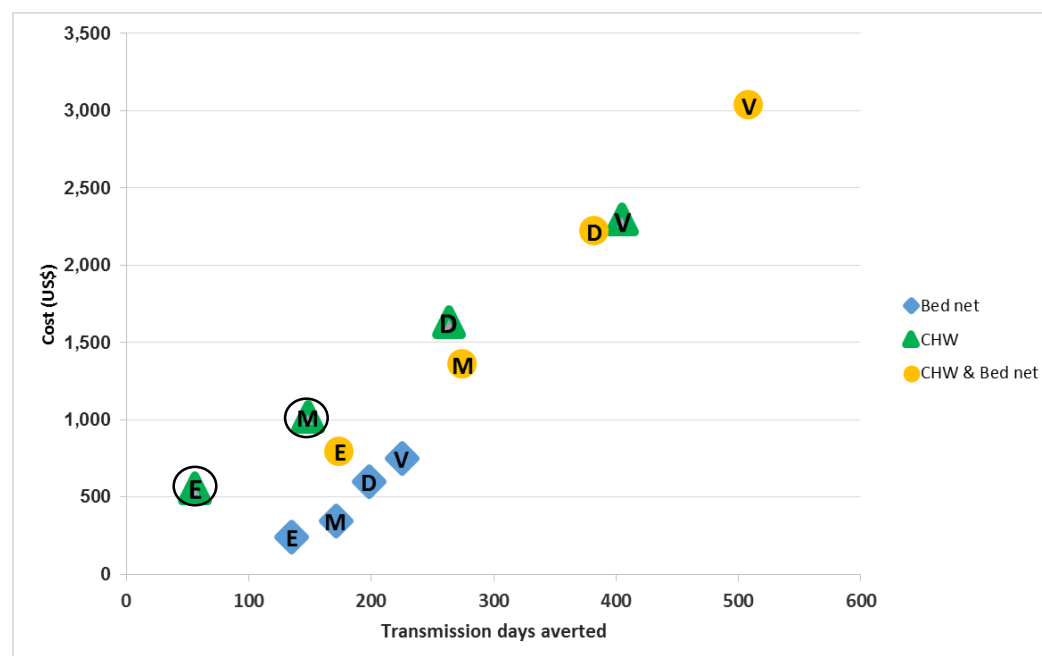

\* Circle indicates a dominated intervention.
